# Supplementary material
Source: PubMed Central journal article supplement (PMC2780813)
Supplement: 0910398106_0910398106SI.pdf [file 0910398106_0910398106SI.pdf]

# Supporting Information

Gregorian et al. 10.1073/pnas.0910398106

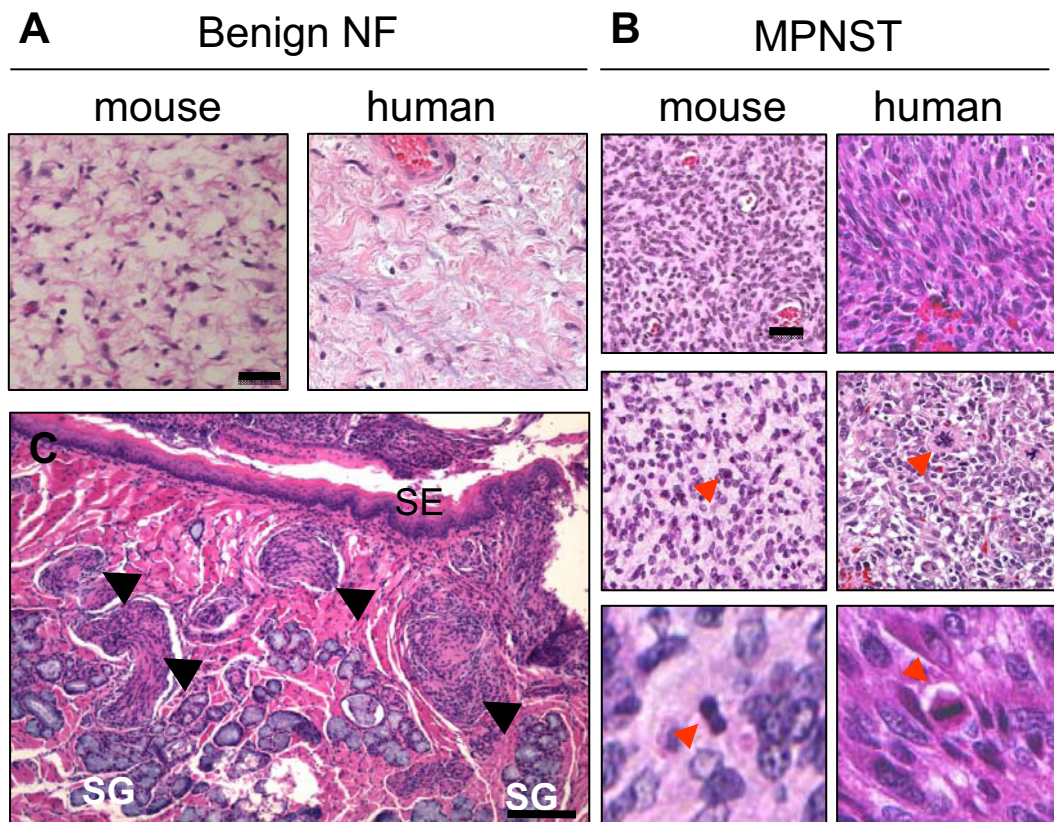

**Fig. S1.** Histopathological comparison of human NF1 and NF1-associated MPNST lesion with that *mGFAP-Cre<sup>+</sup>;Pten<sup>loxpl/+</sup>;LSL-K-ras<sup>G12D/+</sup>* model. Representative tumors were subjected to histopathological analysis, which reveals the presence of (A) benign NF (scale bar, 25 mm) and (B) MPNSTs. MPNST tumors have increased cellularity (B, top), cellular anaplasia (middle, nuclear pleomorphism; arrowheads with an adjacent atypical mitosis; scale bar, 25 mm), and obvious mitoses (bottom, arrowheads). (C) H&E stain of *mGFAP-Cre<sup>+</sup>;Pten<sup>loxpl/+</sup>;LSL-K-ras<sup>G12D/+</sup>* mouse tumor revealed multiple microscopic tumor nodules (arrows), which resemble clinical classification as plexiform NFs. (Scale bar, 155 mm.) SE, squamous epithelium; SG, salivary glands.

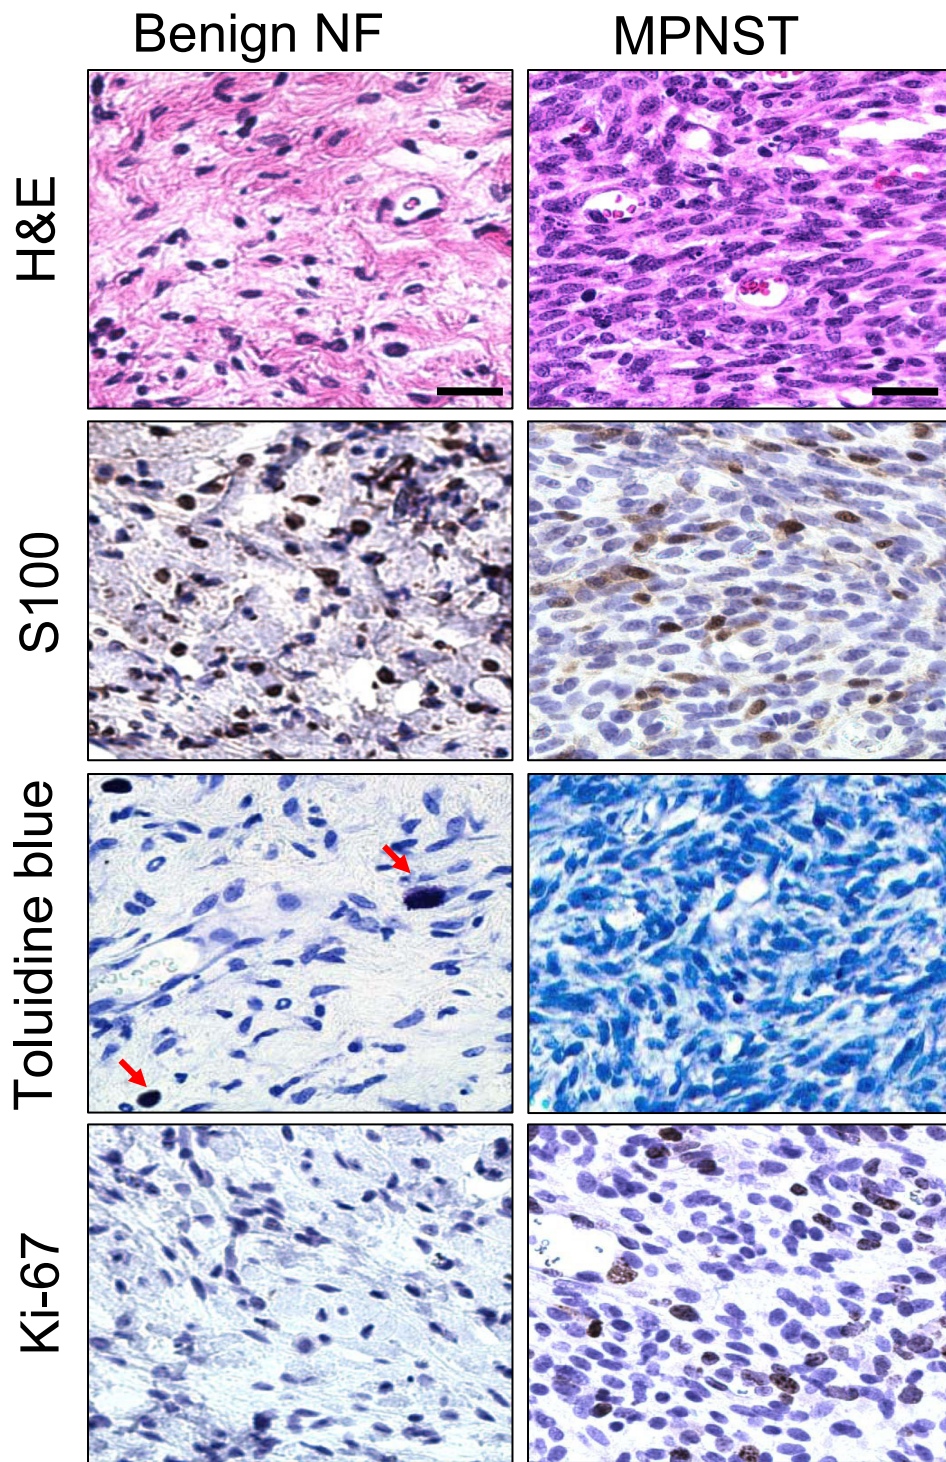

**Fig. S2.** Characterization of NF (benign NF) and MPNST lesions (top panels) of *mGFAP-Cre<sup>+</sup>;Pten<sup>loxP/+</sup>;LSL-K-ras<sup>G12D/+</sup>* mutant mice revealed S100 staining of Schwann cells (second panels), toluidine stained mast cells (third panels), and staining for proliferation marker Ki-67 (lower panels). (Scale bars, 20  $\mu$ m.) NFs show more diffuse S100 staining, increased numbers of mast cells, and a reduced Ki-67 rate compared to MPNSTs.

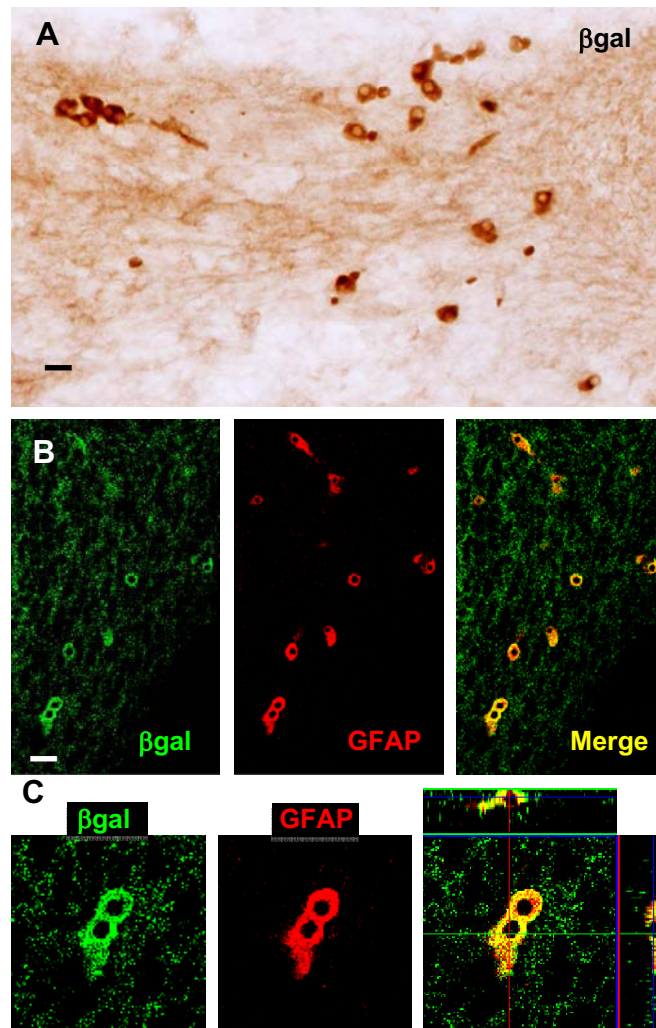

**Fig. S3.** mGFAP-Cre expression completely overlaps with the endogenous GFAP expression pattern. (A) Anti- $\beta$ -gal IHC-stained sections were examined and photographed using bright field microscopy; (B) a consecutive section was co-stained with anti- $\beta$ -gal and anti-GFAP antibodies and photographed using fluorescence microscopy (Zeiss) and scanning confocal laser microscopy (Leica) to show complete overlapping expressions of both markers. (C) High power images of panel B.

**A**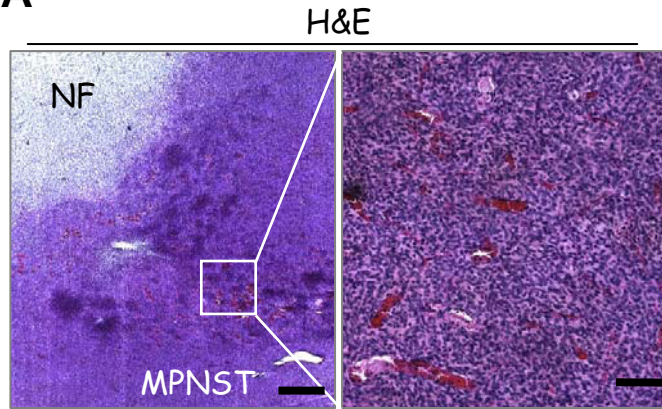**B**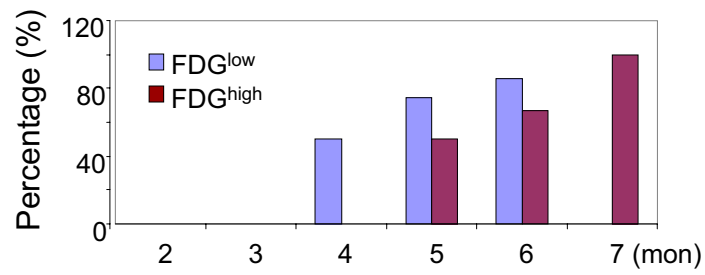

**Fig. S4.** (A) H&E stained section shows increased angiogenesis in MPNST lesions. (B) Percentages of animals with detectable FDG<sup>low</sup> and FDG<sup>high</sup> lesions.
